# Supplementary material for: A phosphine-free, heterogeneous palladium-catalyzed atom-efficient carbonylative cross-coupling of triorganoindiums with aryl halides leading to unsymmetrical ketones
Source: Royal Society of Chemistry journal article supplement (doi:10.1039/c7nj02969a), 2017-01-01
Supplement: c7nj02969a1.pdf [file c7nj02969a1.pdf]

**Electronic Supplementary Material (ESI) for New Journal of Chemistry**

**Supporting Information**

**A phosphine-free, heterogeneous palladium-catalyzed atom-efficient carbonylative cross-coupling of triorganoindiums with aryl halides leading to unsymmetrical ketones**

Shengyong You,<sup>a</sup> Ruian Xiao,<sup>b,\*</sup> Haiyi Liu<sup>a</sup> and Mingzhong Cai<sup>a,\*</sup>

*<sup>a</sup> Key Laboratory of Functional Small Organic Molecule, Ministry of Education and College of Chemistry & Chemical Engineering, Jiangxi Normal University, Nanchang 330022, P. R. China*

*<sup>b</sup> 912 Lab Jiangxi Bureau of Geology and Mineral Exploration and Development, Yingtan 335001, P. R. China*

E-mail: mzcai@jxnu.edu.cn; xiaoruian@163.com

**<sup>1</sup>H NMR and <sup>13</sup>C NMR spectra of compounds 3a-3e' and 4a, 4b.**



<sup>1</sup>H NMR and <sup>13</sup>C NMR spectra of compound **3a**



$^1\text{H}$  NMR and  $^{13}\text{C}$  NMR spectra of compound **3b**



<sup>1</sup>H NMR and <sup>13</sup>C NMR spectra of compound 3c



<sup>1</sup>H NMR and <sup>13</sup>C NMR spectra of compound **3d**



<sup>1</sup>H NMR and <sup>13</sup>C NMR spectra of compound **3e**



<sup>1</sup>H NMR and <sup>13</sup>C NMR spectra of compound **3f**



<sup>1</sup>H NMR and <sup>13</sup>C NMR spectra of compound **3g**



<sup>1</sup>H NMR and <sup>13</sup>C NMR spectra of compound **3h**



<sup>1</sup>H NMR and <sup>13</sup>C NMR spectra of compound **3i**



<sup>1</sup>H NMR and <sup>13</sup>C NMR spectra of compound **3j**



<sup>1</sup>H NMR and <sup>13</sup>C NMR spectra of compound 3k

LHY4



<sup>1</sup>H NMR and <sup>13</sup>C NMR spectra of compound 31

LHY5



Cur  
NAME  
EXPR  
PROC  
F2 -  
Date  
TIME  
INST  
PROC  
POLL  
TO  
SOLV  
MS  
DS  
SWH  
FID  
AQ  
RG  
DW  
DE  
TE  
SI  
MCR  
MCRB  
====  
MDC1  
P1  
PL1  
SP01  
F2 -  
SI  
SF  
MCM  
SDB  
LB  
GB  
PC



<sup>1</sup>H NMR and <sup>13</sup>C NMR spectra of compound **3m**



<sup>1</sup>H NMR and <sup>13</sup>C NMR spectra of compound **3n**



<sup>1</sup>H NMR and <sup>13</sup>C NMR spectra of compound **30**



<sup>1</sup>H NMR and <sup>13</sup>C NMR spectra of compound **3p**



<sup>1</sup>H NMR and <sup>13</sup>C NMR spectra of compound **3q**



<sup>1</sup>H NMR and <sup>13</sup>C NMR spectra of compound 3r



<sup>1</sup>H NMR and <sup>13</sup>C NMR spectra of compound 3s



<sup>1</sup>H NMR and <sup>13</sup>C NMR spectra of compound **3t**



$^1\text{H}$  NMR and  $^{13}\text{C}$  NMR spectra of compound **3u**





<sup>1</sup>H NMR and <sup>13</sup>C NMR spectra of compound 3w



<sup>1</sup>H NMR and <sup>13</sup>C NMR spectra of compound **3x**



<sup>1</sup>H NMR and <sup>13</sup>C NMR spectra of compound **3y**



$^1\text{H}$  NMR and  $^{13}\text{C}$  NMR spectra of compound **3z**



<sup>1</sup>H NMR and <sup>13</sup>C NMR spectra of compound 3a'



<sup>1</sup>H NMR and <sup>13</sup>C NMR spectra of compound **3b'**



<sup>1</sup>H NMR and <sup>13</sup>C NMR spectra of compound **3c'**



<sup>1</sup>H NMR and <sup>13</sup>C NMR spectra of compound 3d'



<sup>1</sup>H NMR and <sup>13</sup>C NMR spectra of compound **3e'**



<sup>1</sup>H NMR and <sup>13</sup>C NMR spectra of compound **4a**



$^1\text{H}$  NMR and  $^{13}\text{C}$  NMR spectra of compound **4b**
